# Supplementary material for: The Effects of Virtual Reality Training on Balance, Gross Motor Function, and Daily Living Ability in Children With Cerebral Palsy: Systematic Review and Meta-analysis
Source: PubMed Central journal article supplement (PMC9685515; doi:10.2196/38972), 2022-11-09
Supplement: games_v10i4e38972_app3.pdf [file games_v10i4e38972_app3.pdf]

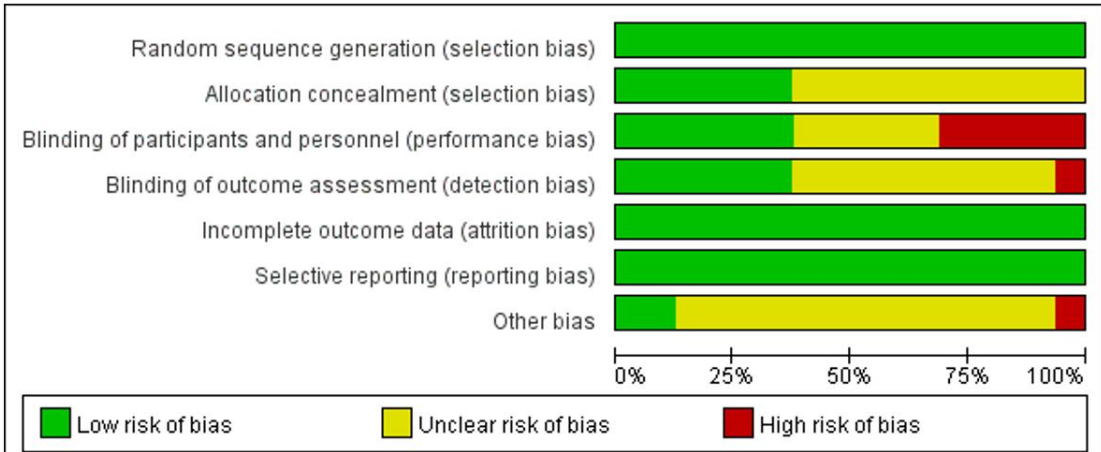

| Author             | Random sequence generation (selection bias) | Allocation concealment (selection bias) | Blinding of participants and personnel (performance bias) | Blinding of outcome assessment (detection bias) | Incomplete outcome data (attrition bias) | Selective reporting (reporting bias) | Other bias |
|--------------------|---------------------------------------------|-----------------------------------------|-----------------------------------------------------------|-------------------------------------------------|------------------------------------------|--------------------------------------|------------|
| Acai2016           | +                                           | +                                       | +                                                         | +                                               | +                                        | +                                    | ?          |
| Atasevun Uysal2016 | +                                           | +                                       | +                                                         | +                                               | +                                        | +                                    | ?          |
| chen2013           | +                                           | ?                                       | +                                                         | +                                               | +                                        | +                                    | ?          |
| cho2016            | +                                           | ?                                       | +                                                         | +                                               | +                                        | +                                    | ?          |
| Jha2021            | +                                           | +                                       | +                                                         | +                                               | +                                        | +                                    | ?          |
| Jung2021           | +                                           | ?                                       | +                                                         | +                                               | +                                        | +                                    | ?          |
| Pin2019            | +                                           | +                                       | +                                                         | +                                               | +                                        | +                                    | +          |
| Ren2016            | +                                           | ?                                       | +                                                         | +                                               | +                                        | +                                    | +          |
| Sahin2020          | +                                           | ?                                       | +                                                         | +                                               | +                                        | +                                    | ?          |
| Sajan2017          | +                                           | +                                       | +                                                         | +                                               | +                                        | +                                    | ?          |
| Sharan2012         | +                                           | ?                                       | +                                                         | +                                               | +                                        | +                                    | +          |
| Tarakci2016        | +                                           | +                                       | +                                                         | +                                               | +                                        | +                                    | ?          |
| Wang2020           | +                                           | ?                                       | ?                                                         | ?                                               | +                                        | +                                    | ?          |
| Xu2019             | +                                           | ?                                       | ?                                                         | ?                                               | +                                        | +                                    | ?          |
| Yang2019           | +                                           | ?                                       | +                                                         | ?                                               | +                                        | +                                    | ?          |
| Zhao2018           | +                                           | ?                                       | ?                                                         | ?                                               | +                                        | +                                    | ?          |
