# Supplementary material for: The Effects of Virtual Reality Training on Balance, Gross Motor Function, and Daily Living Ability in Children With Cerebral Palsy: Systematic Review and Meta-analysis
Source: PubMed Central journal article supplement (PMC9685515; doi:10.2196/38972), 2022-11-09
Supplement: games_v10i4e38972_app4.pdf [file games_v10i4e38972_app4.pdf]

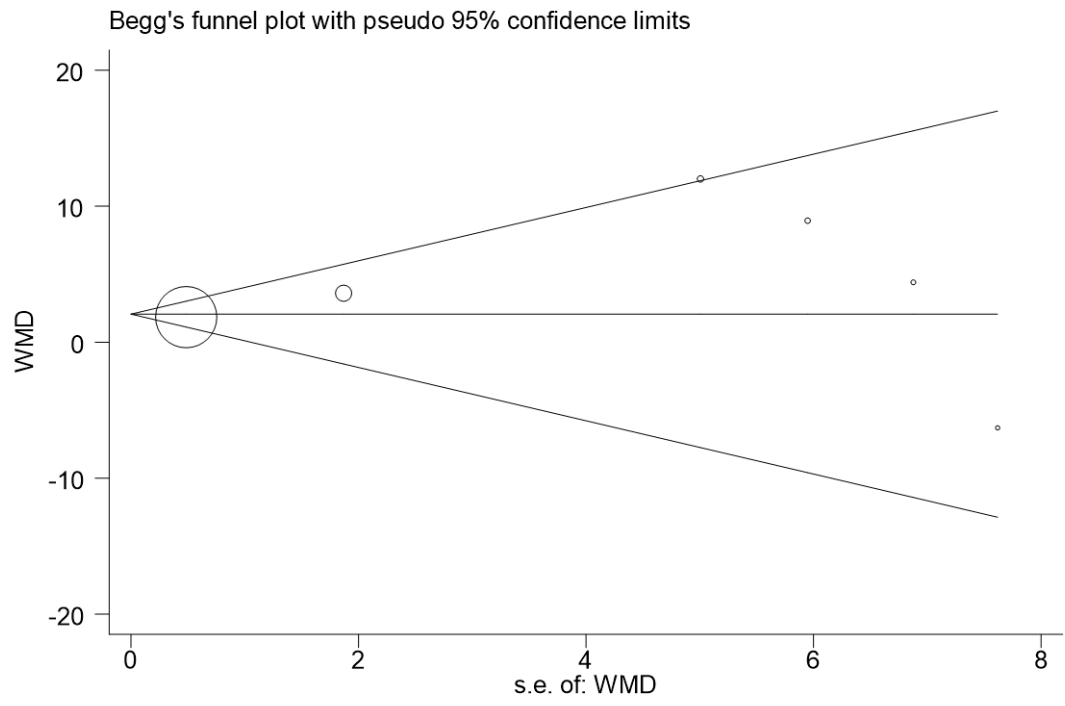

Figure S1

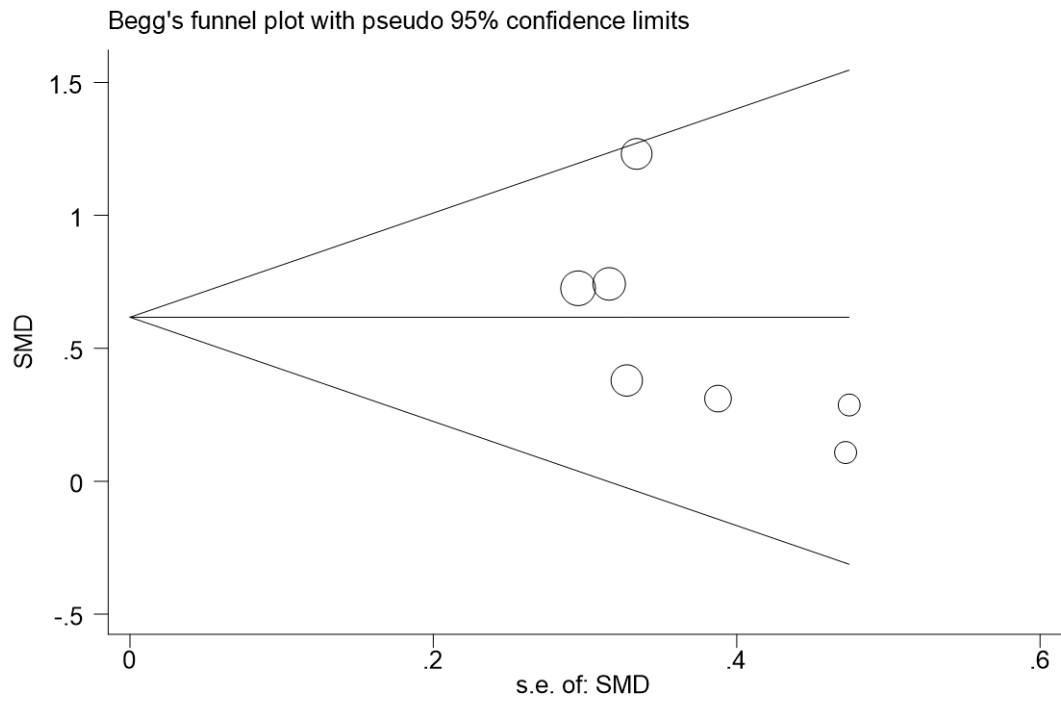

Figure S2

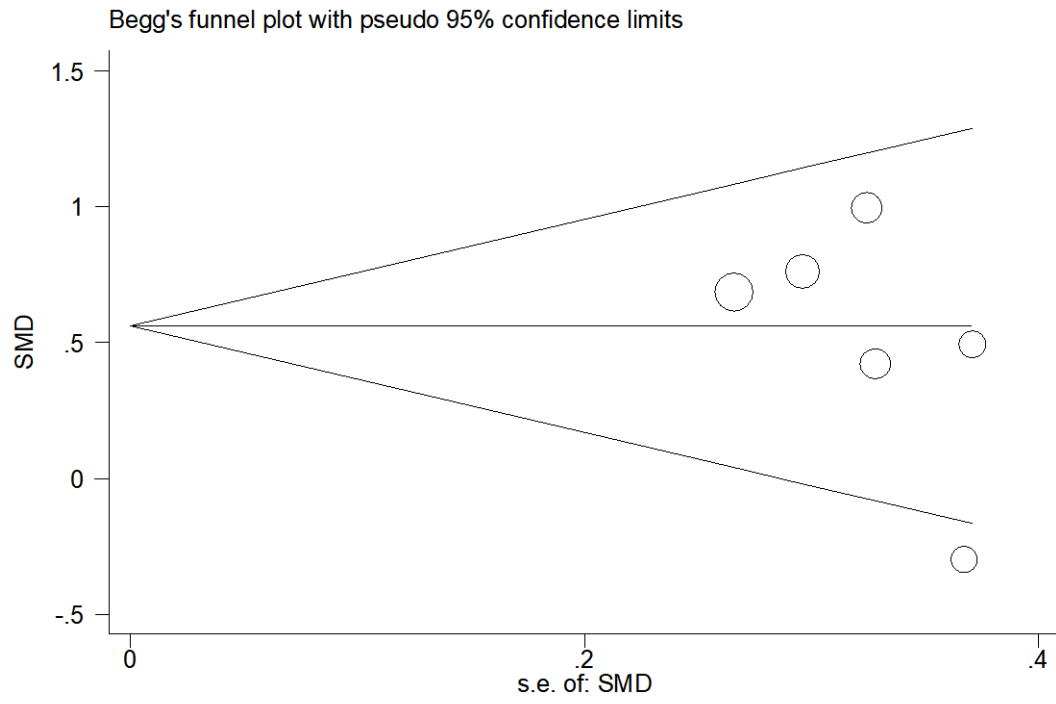

Figure S3
